# Supplementary material for: Cigarette smoking induces the activation of RIP2/caspase-12/NF-κB axis in oral squamous cell carcinoma
Source: PeerJ. 2022 Nov 4;10:e14330. doi: 10.7717/peerj.14330 (PMC9639427; doi:10.7717/peerj.14330)
Supplement: Supplemental Information 1 [file peerj-10-14330-s001.xlsx]

## Sheet: Sheet1
Fig. 1. Cigarette smoking activated RIP2/NF-κB pathway in patients with OSCC.
Fig. 1A The protein level of RIP2 in the oral mucosa of OSCC between non-smokers and smokers.
Non-smokers	1.62005	0.756594	0.700937	0.922422	0.0406747	1.04196	1.91737	0.100971	1.01832	1.88071
Smokers	9.36415	5.12613	1.6324	1.51756	8.15783	2.81907	4.87279	6.73485	2.42243	4.16398
Fig. 1B The score of RIP2 immunohistochemical staining in the oral mucosa of OSCC between non-smokers and smokers.
Non-smokers	0.21623	0.129499	0.192419	0.170708	0.178931	0.192897	0.158145	0.145274	0.192388	0.186177
Smokers	0.328935	0.344028	0.186883	0.268222	0.176385	0.239583	0.191545	0.211204	0.22462	0.174984
Fig. 1C The protein level of NF-κB p65 in the oral mucosa of OSCC between non-smokers and smokers.
Non-smokers	3.21078	1.07938	0.880842	0.553994	0.930078	0.587434	0.982204	0.948475	0.722357	0.104461
Smokers	1.95589	3.15699	2.72898	4.26102	3.75178	2.904	3.76302	1.58073	0.725886	0.731946
Fig. 1D The score of NF-κB p65 immunohistochemical staining in the oral mucosa of OSCC between non-smokers and smokers.
Non-smokers	0.167359	0.234905	0.172795	0.140996	0.150012	0.185165	0.151804	0.242543	0.159236	0.164801
Smokers	0.194497	0.248325	0.217568	0.281266	0.260021	0.168204	0.187436	0.256195	0.162374	0.293361
Fig. 1E The protein level of nuclear NF-κB p65 in the oral mucosa of OSCC between non-smokers and smokers.
Non-smokers	1.28463	0.916039	1.46955	0.03541	0.510422	3.64538	0.596568	0.111912	0.84917	0.58091
Smokers	6.66694	6.58859	0.615907	0.198421	5.15203	2.88619	3.69124	0.257183	6.35764	6.20942
Fig. 2. Caspase-12 increased in smokers compared with non-smokers among oral mucosa of OSCC patients.
Fig. 2A The protein level of caspase-12 in the oral mucosa of OSCC between non-smokers and smokers.
Non-smokers	1.12047	4.49629	0.226264	1.11014	0.537923	0.03805	2.12336	0.289042	0.185308	0.873129
Smokers	4.96529	4.93142	3.46456	6.48115	3.44876	2.31004	2.72222	5.02285	4.25446	0.598176
Fig. 2B The score of caspase-12 immunohistochemical staining in the oral mucosa of OSCC between non-smokers and smokers.
Non-smokers	0.2663	0.283295	0.367364	0.297101	0.283532	0.353986	0.339754	0.229927	0.317905	0.336779
Smokers	0.466043	0.304689	0.35448	0.536597	0.478032	0.297969	0.405263	0.311316	0.511588	0.585957
Fig. 3. Different concentrations of CSE treatment promoted RIP2/NF-κB and caspase-12 protein in HSC-3 cells.
Fig. 3A The level of RIP2 in HSC-3 cells in the presence of different concentrations of CSE.
The concentration of CSE		0	0.5%	1%	2%	4%
		0.477	0.901	2.923	6.524	5.796
		1.274	1.451	3.37	6.685	6.052
		1.249	0.944	3.125	5.524	6.438
Fig. 3A The level of NF-κB p65 in HSC-3 cells in the presence of different concentrations of CSE.
The concentration of CSE		0	0.5%	1%	2%	4%
		0.859	0.825	1.306	6.488	13.763
		0.842	0.817	1.27	6.332	13.517
		1.299	1.446	1.75	7.099	14.091
Fig. 3B The level of nuclear NF-κB p65 in HSC-3 cells in the presence of different concentrations of CSE.
The concentration of CSE		0	0.5%	1%	2%	4%
		1	1.10811	2.68243	2.9527	6.92568
		1.07432	1.25	1.79054	3.28378	7.57432
		0.925676	1.10811	1.92568	2.91216	5.77703
Fig. 3C The level of caspase-12 in HSC-3 cells in the presence of different concentrations of CSE.
The concentration of CSE		0	0.5%	1%	2%	4%
		1.165	3.179	4.573	4.761	12.959
		0.871	2.936	4.39	4.158	11.182
		0.964	3.672	5.036	5.24	13.173
Fig. 4. RIP2 knockdown mediated the downregulation of caspase-12 and NF-κB in CSE-treatment HSC-3 cells.
Fig. 4B The level of RIP2 in HSC-3 cells transfected with RIP2 siRNA or NC siRNA for 24 h before treatment with 4% CSE.
NC siRNA	RIP2 siRNA
1.02116	0.025732
0.985466	0.076984
0.993371	0.076551
Fig. 4C The level of caspase-12 in HSC-3 cells transfected with RIP2 siRNA or NC siRNA for 24 h before treatment with 4% CSE.
NC siRNA	RIP2 siRNA
1.01867	0.423523
0.95449	0.351648
1.02684	0.421137
Fig. 4D The level of NF-κB p65 in HSC-3 cells transfected with RIP2 siRNA or NC siRNA for 24 h before treatment with 4% CSE.
NC siRNA	RIP2 siRNA
1.03603	0.310839
0.919636	0.102541
1.04434	0.309089
Fig. 4F The level of nuclear NF-κB p65 in HSC-3 cells transfected with RIP2 siRNA or NC siRNA for 24 h before treatment with 4% CSE.
NC siRNA	RIP2 siRNA
0.988588	0.512046
0.931718	0.475936
1.07969	0.547912
